# Supplementary material for: The Fabrication and Property Characterization of a Ho2YSbO7/Bi2MoO6 Heterojunction Photocatalyst and the Application of the Photodegradation of Diuron under Visible Light Irradiation
Source: MDPI journal article supplement (doi:10.3390/ijms25084418), 2024-04-17
Supplement: s1 [file s1]

# Fabrication, Property Characterization of $\text{Ho}_2\text{YSbO}_7/\text{Bi}_2\text{MoO}_6$ Heterojunction Photocatalyst and the Application of the Photodegradation of Diuron under Visible Light Irradiation

Liang Hao <sup>1</sup> and Jingfei Luan <sup>1,2,\*</sup>

<sup>1</sup> School of Physics, Changchun Normal University, Changchun 130032, China; hliang0725@163.com (L.H.)

<sup>2</sup> State Key Laboratory of Pollution Control and Resource Reuse, School of the Environment, Nanjing University, Nanjing 210093, China

\* Correspondence: jfluan@nju.edu.cn; Tel.: +86-19951939498

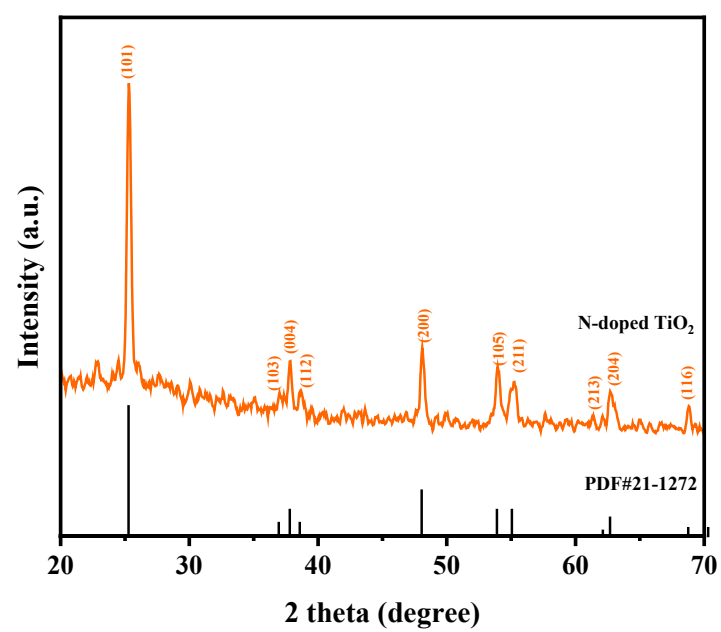

Figure S1. XRD imagery of N-doped TiO<sub>2</sub>.

The calculation process of “ $n$ ” value are shown as below: Following the equation (2),  $E_g$  and  $n$  could be determined: (1) plotting  $\ln(\alpha h\nu)$  versus  $\ln(h\nu - E_g)$  assuming an approximate value of  $E_g$ ; (2) deducing the value of  $n$  in accordance with the slope in this graph; (3) refining the value of  $E_g$  by plotting  $(\alpha h\nu)^{1/n}$  versus  $h\nu$  and extrapolating the plot to  $(\alpha h\nu)^{1/n} = 0$ . First, the direct method (1240/transition wavelength  $\lambda$ ) was used to estimate the band gap  $E_g$  of  $\text{Ho}_2\text{YSbO}_7$  or  $\text{Bi}_2\text{MoO}_6$ ; as a result, the  $E_g$  of  $\text{Ho}_2\text{YSbO}_7$  or  $\text{Bi}_2\text{MoO}_6$  was estimated to be 2.750 eV (1240/450) or 2.455 eV (1240/505). Secondly, an indirect method (Equation (2)) was utilized to measure the precise band gap width of  $\text{Ho}_2\text{YSbO}_7$  or  $\text{Bi}_2\text{MoO}_6$  using 2.750 eV or 2.455 eV within Equation (2). Based on the above steps, the values of  $E_g$  for  $\text{Ho}_2\text{YSbO}_7$  or  $\text{Bi}_2\text{MoO}_6$  were calculated to be 2.686 eV or 2.483 eV. The value of  $n$  was determined to be approximately 2, indicating that the optical transition in  $\text{Ho}_2\text{YSbO}_7$  or  $\text{Bi}_2\text{MoO}_6$  was indirectly allowed, as shown in Figure S2.

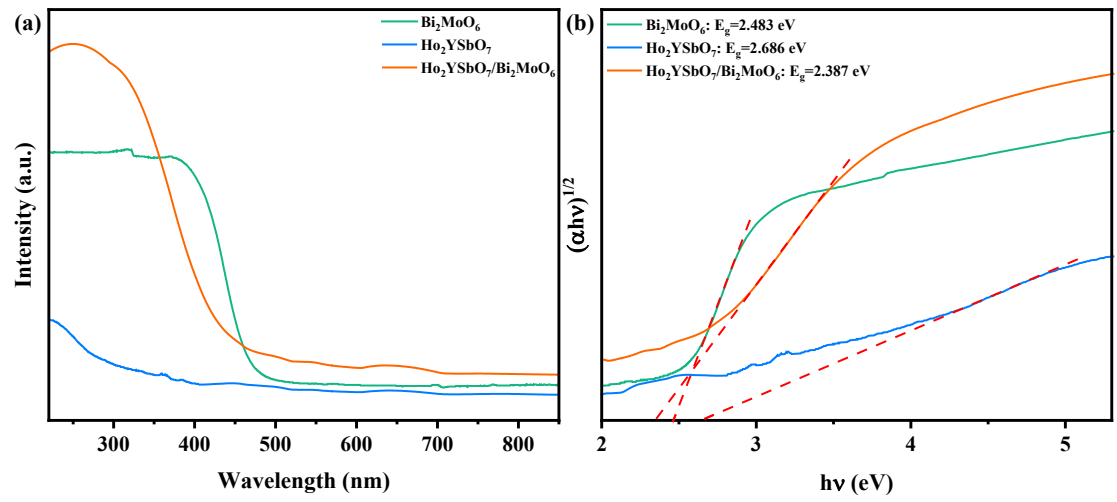

**Figure S2.** (a) The UV-Vis diffuse reflectance spectra and (b) Correlative diagram of  $(\alpha h\nu)^{1/2}$  and  $h\nu$  of the synthesized HBHP,  $\text{Ho}_2\text{YSbO}_7$  and  $\text{Bi}_2\text{MoO}_6$ .

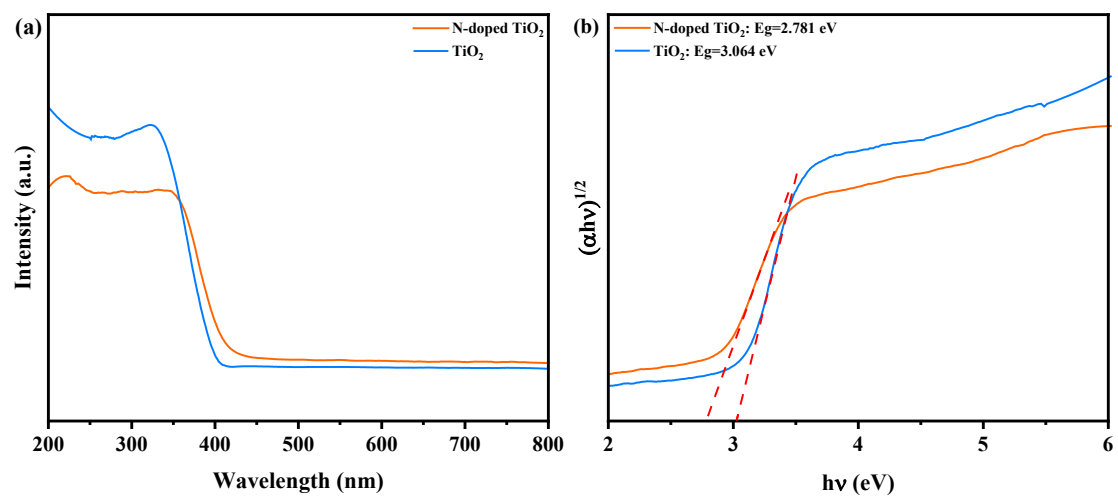

**Figure S3.** (a) The UV-Vis diffuse reflectance spectra and (b) Correlative diagram of  $(\alpha h\nu)^{1/2}$  and  $h\nu$  of N-doped TiO<sub>2</sub> and TiO<sub>2</sub>.

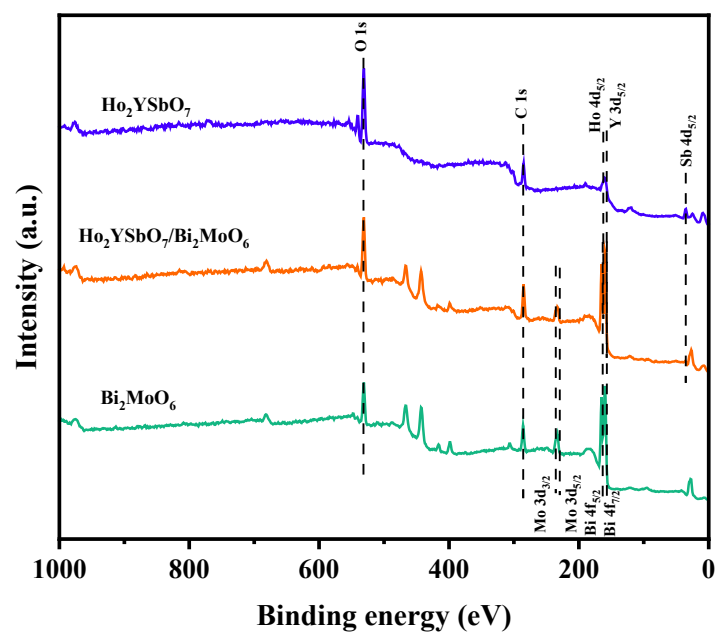

**Figure S4.** The XPS full spectrum of the synthesized HBHP,  $\text{Ho}_2\text{YSbO}_7$  and  $\text{Bi}_2\text{MoO}_6$ .

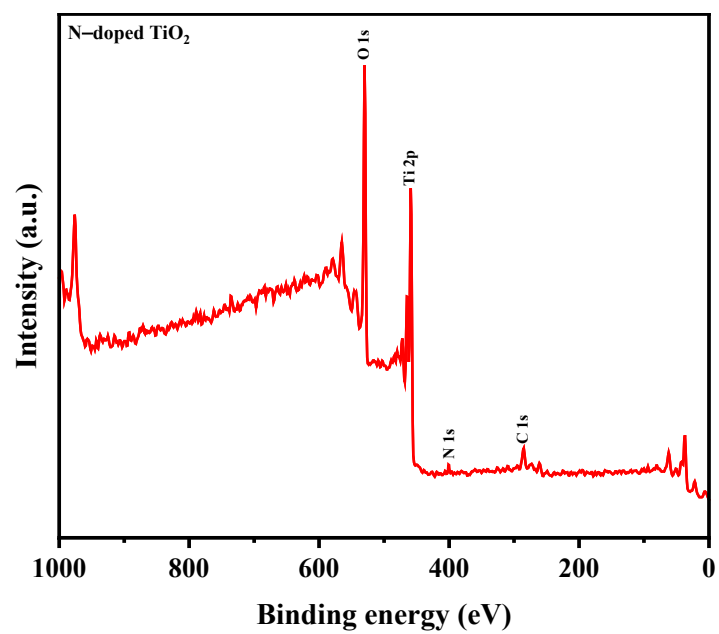

**Figure S5.** The XPS full spectrum of N-doped TiO<sub>2</sub>.

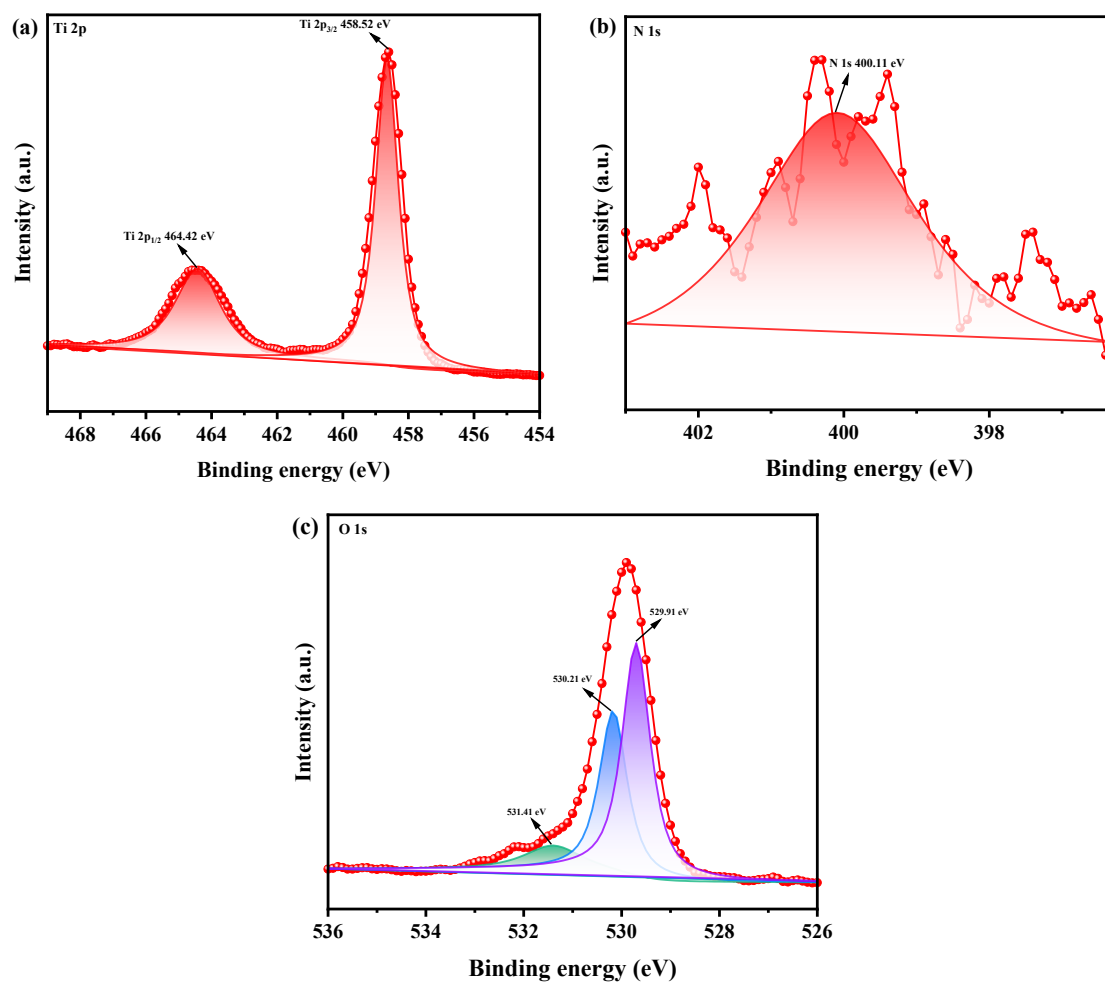

**Figure S6.** The corresponding high-resolution XPS spectra of (a) Ti 2p, (b) N 1s and (c) O 1s of N-doped  $\text{TiO}_2$ .



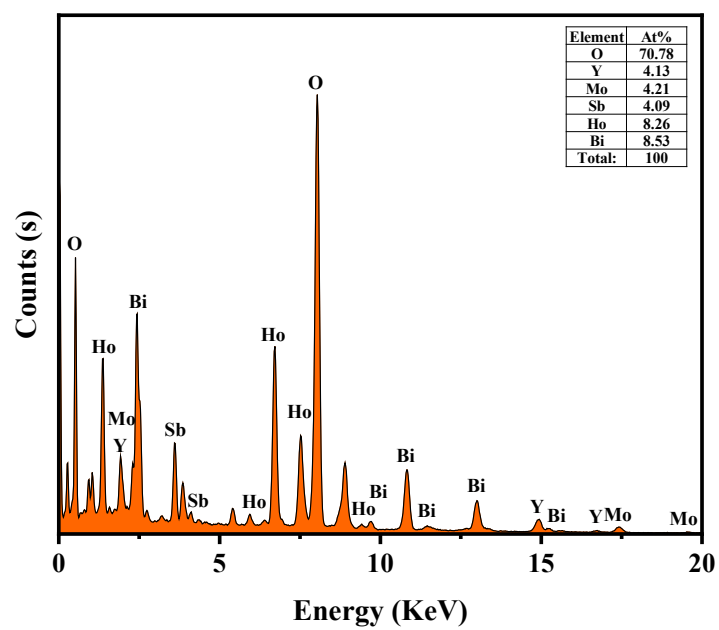

**Figure S7.** The EDS spectrum of HBHP.

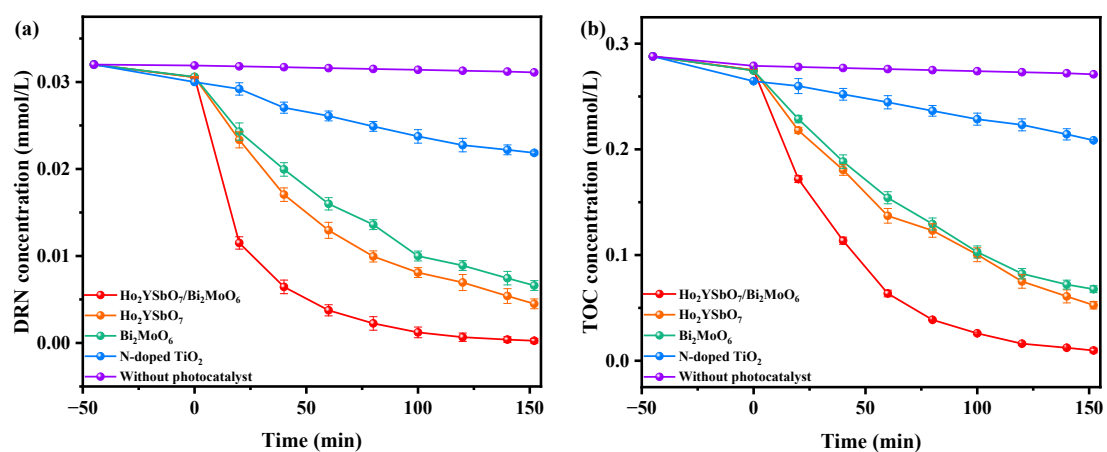

**Figure S8.** Concentration fluctuation graphs of (a) DRN and (b) TOC during photodegradation of DRN with HBHP, Ho<sub>2</sub>YSbO<sub>7</sub>, Bi<sub>2</sub>MoO<sub>6</sub>, NTO or without sample as the catalytic sample under VLE.

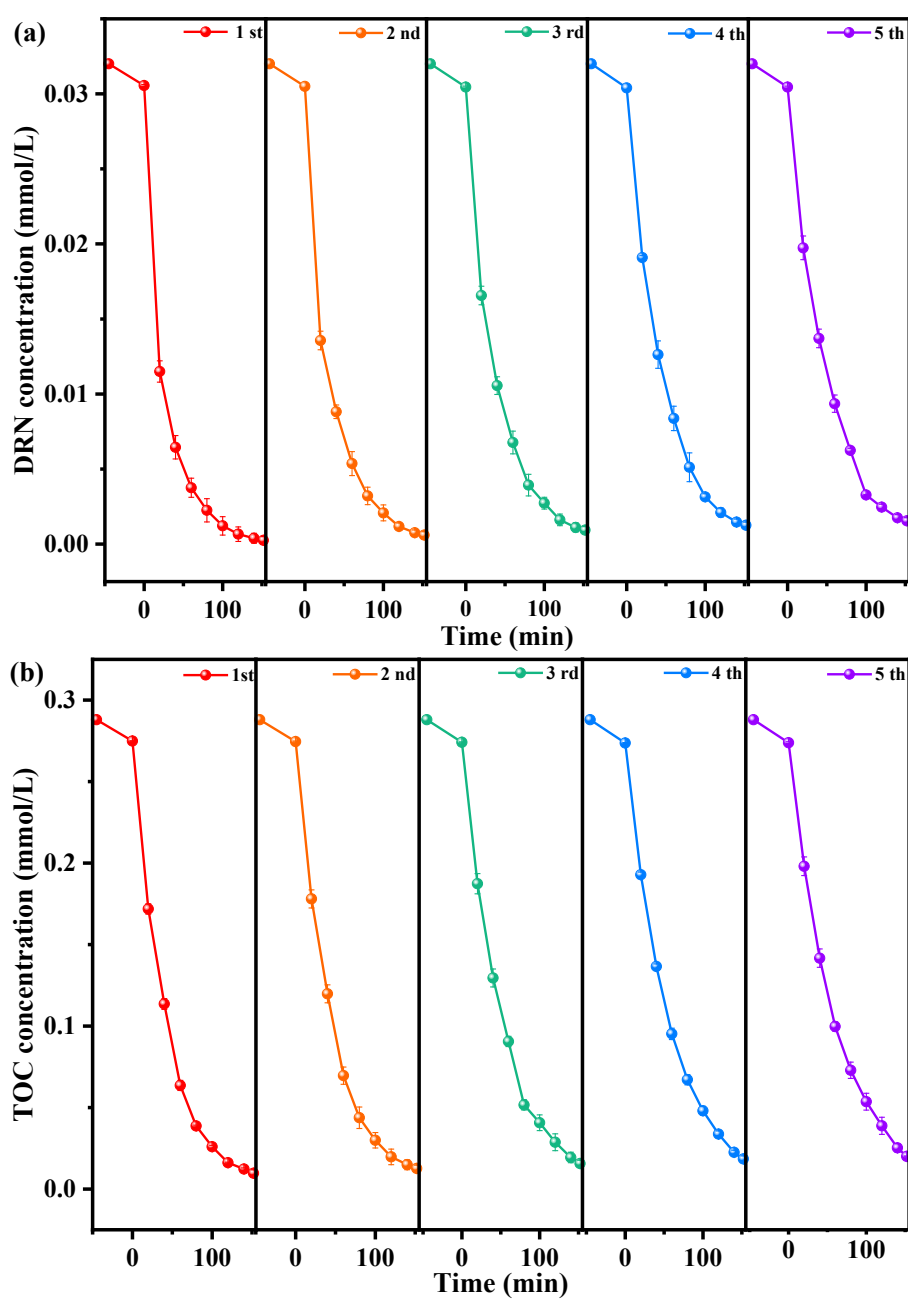

**Figure S9.** Concentration fluctuation graphs of (a) DRN and (b) TOC during photodegradation of DRN in pesticides wastewater with HBHP as photocatalyst under VLE for five consecutive degradation cycles tests.

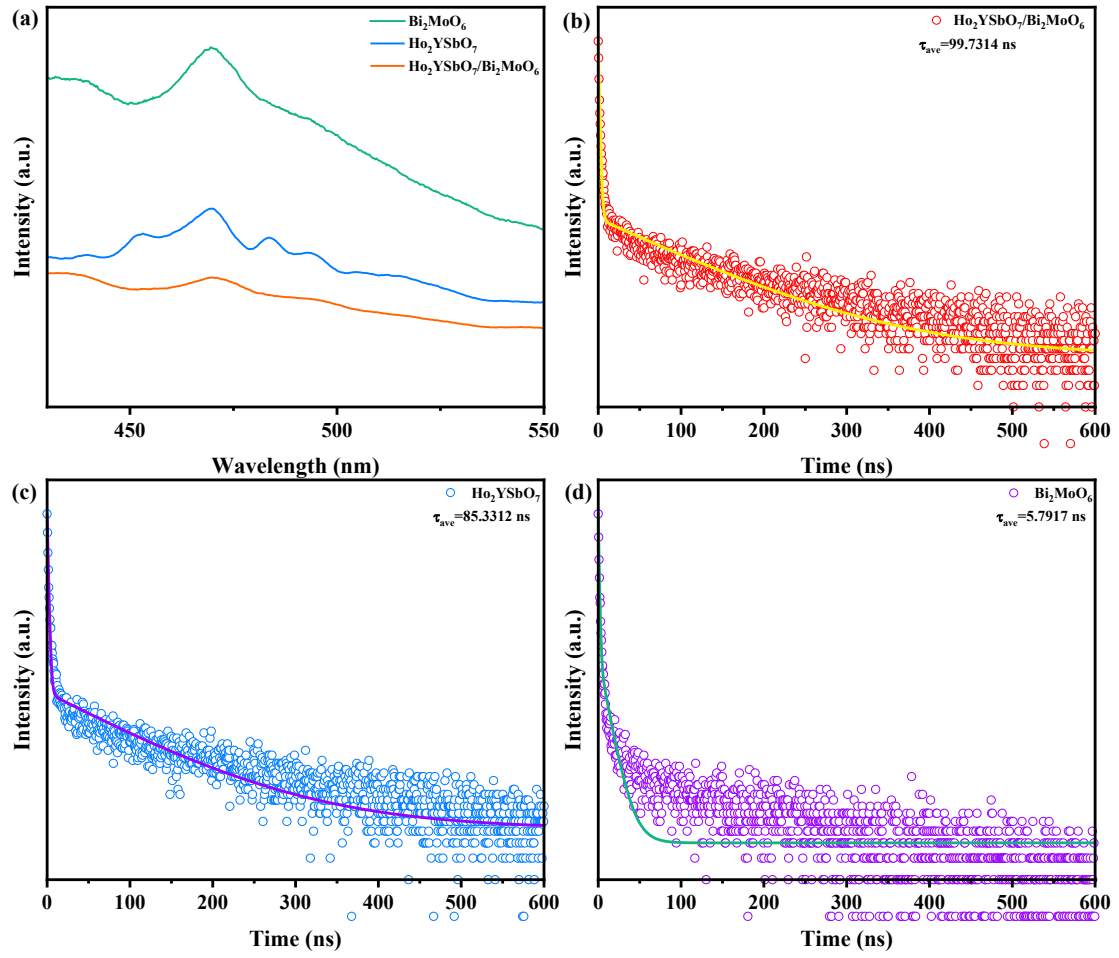

**Figure S10.** (a) PL spectrum of HBHP,  $\text{Ho}_2\text{YSbO}_7$  and  $\text{Bi}_2\text{MoO}_6$ , and TRPL spectra of (b) HBHP, (c)  $\text{Ho}_2\text{YSbO}_7$  and (d)  $\text{Bi}_2\text{MoO}_6$ .

**Table S1.** Fitted results of TRPL curves of  $\text{Ho}_2\text{YSbO}_7$ ,  $\text{Bi}_2\text{MoO}_6$  and HBHP.

|                          | $\text{Ho}_2\text{YSbO}_7$ | $\text{Bi}_2\text{MoO}_6$ | $\text{Ho}_2\text{YSbO}_7/\text{Bi}_2\text{MoO}_6$ |
|--------------------------|----------------------------|---------------------------|----------------------------------------------------|
| $A_1$                    | 0.9438                     | 0.9186                    | 0.9547                                             |
| $\tau_1$ (ns)            | 1.289                      | 1.0946                    | 1.4193                                             |
| $A_2$                    | 0.0316                     | 0.0676                    | 0.0325                                             |
| $\tau_2$ (ns)            | 116.1575                   | 11.6284                   | 130.9981                                           |
| $\tau_{\text{ave}}$ (ns) | 85.3321                    | 5.7917                    | 99.7314                                            |

**Table S2.** The identification of degradation products by LC/MS during photocatalytic degradation of diuron.

| Product | Rt (min) | M.W. | Characteristic ions (m/z) |
|---------|----------|------|---------------------------|
| Diuron  | 13.5     | 233  | 233, 177, 72              |
| DCPMU   | 10.3     | 219  | 219, 167, 127             |
| DCPU    | 10.1     | 205  | 205, 167, 127             |
| P1      | 11.3     | 162  | 162, 128, 105             |
| P2      | 14.7     | 248  | 248, 207, 72              |
| P3      | 6.5      | 143  | 143, 71, 126              |
